# Supplementary material
Source: PubMed Central journal article supplement (PMC5778366)
Supplement: IAI.00630-17_zii999092278s4.pdf [file IAI.00630-17_zii999092278s4.pdf]

**Fig. S3. Flow cytometry analysis of T lymphocyte responses by intragastric immunization with *C. muridarum*.**

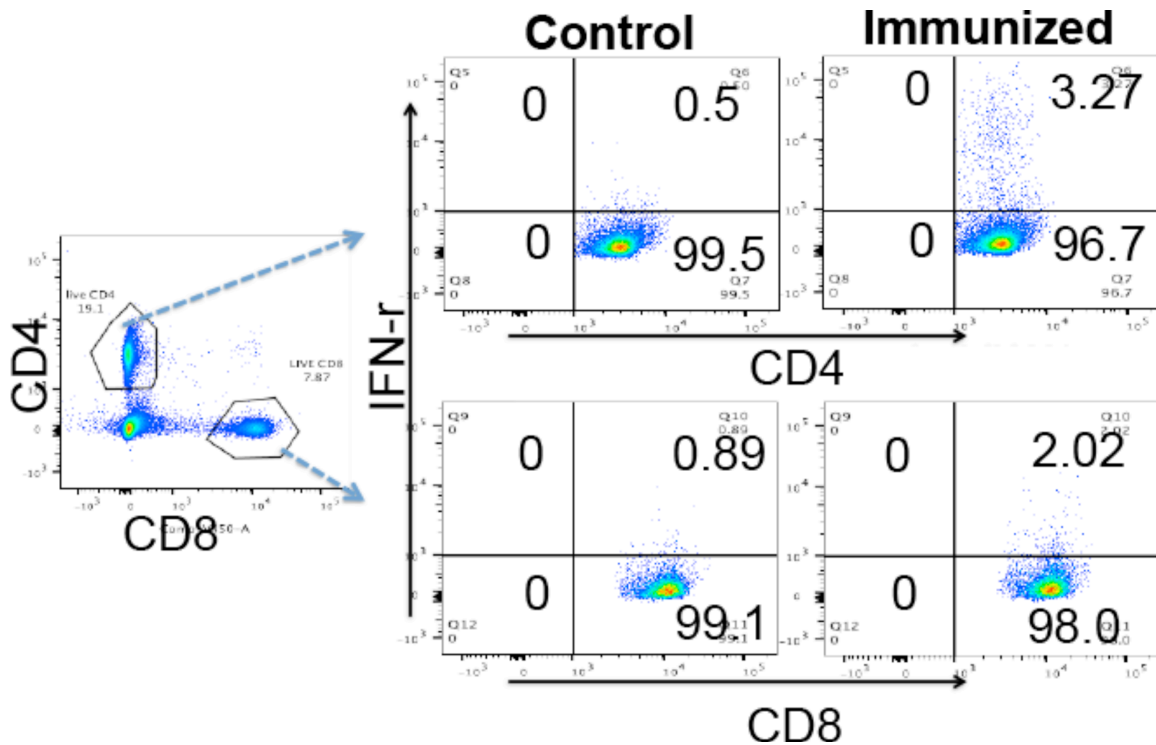

C57BL/6J mice intragastrically immunized with  $2 \times 10^5$  IFUs of CM-mCherry or control mice were sacrificed on day 14 post-immunization to monitor T lymphocyte phenotypes using flow cytometry detection of intracellular cytokines. Representative 2-dimensional plots for identifying IFN $\gamma$ -producing T cells acquired from spleens of a control C57BL/6J mouse (left panels) and immunized mouse (right) respectively were shown. The splenocytes were first gated for live CD4<sup>+</sup> or CD8<sup>+</sup> T cells. Then, the CD4<sup>+</sup> or CD8<sup>+</sup> T cells were gated for expressing cytokines such as IFN $\gamma$  using an intracellular cytokine detection protocol as described in the Materials and Methods section.
